# Supplementary material for: Genetic and Structural Diversity of Prokaryotic Ice-Binding Proteins from the Central Arctic Ocean
Source: MDPI journal article supplement (doi:10.3390/genes14020363), 2023-01-30
Supplement: s1 [file s1]

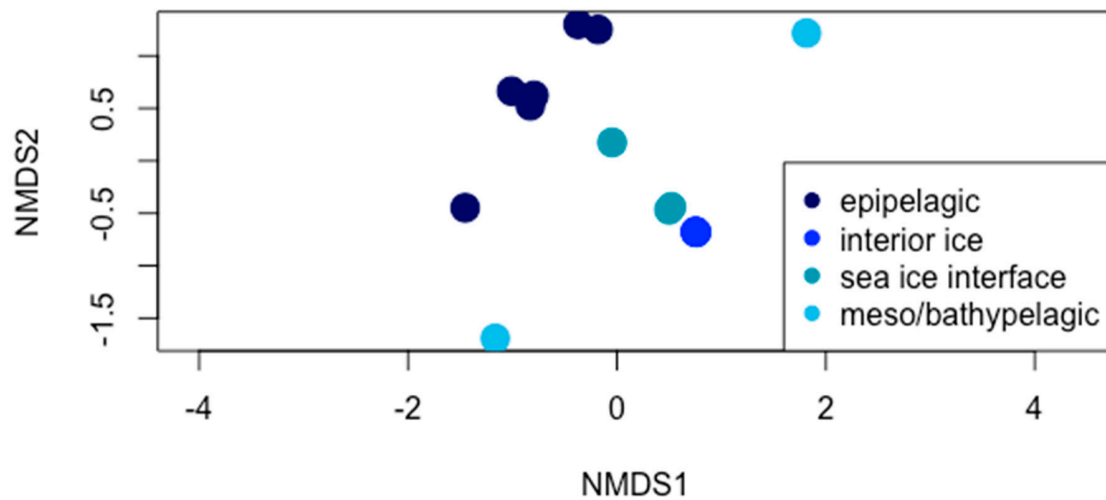

**Supplementary Figure S1:** Non-metric multidimensional scaling of order-level community composition across different environments. Note that interior ice has 4 data points overlapping in the same position.

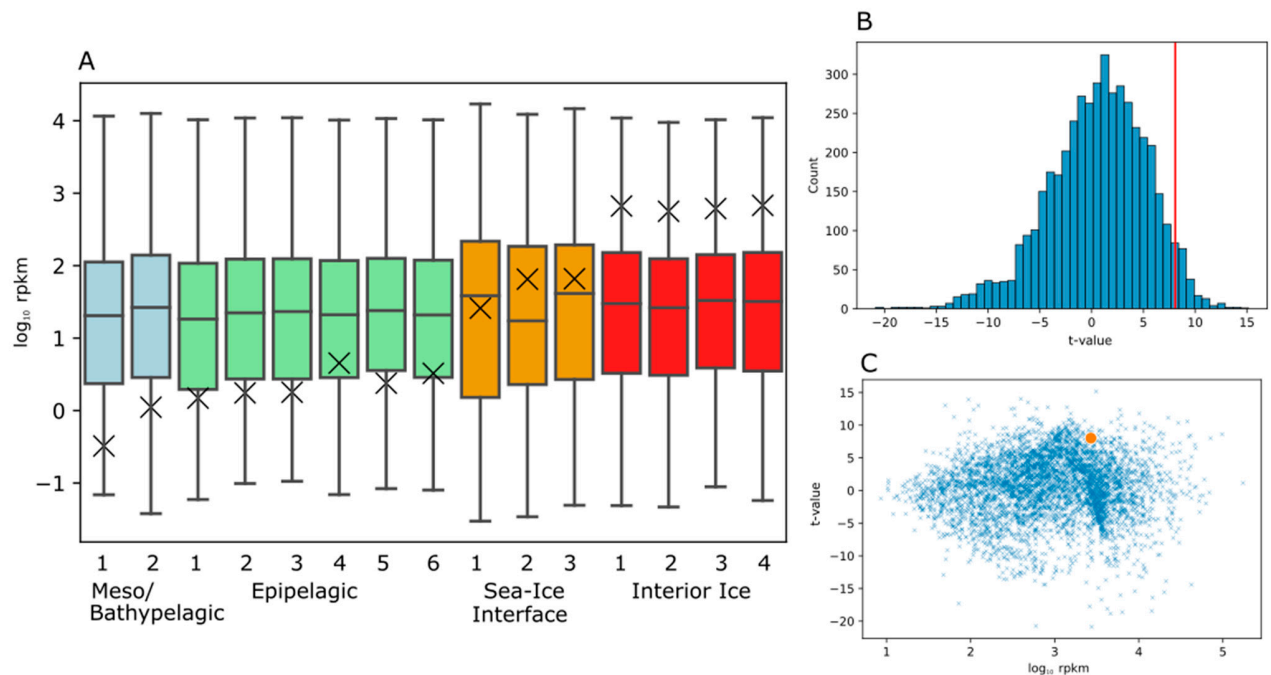

**Supplementary Figure S2:** PF11999 (DUF3494) domains are one of the most differentially abundant Pfams when comparing ice and water.

Panel A: Boxplots of Pfam abundances within the prokaryotic community (log RPKM) across samples; the crosses signify total abundance of the DUF3494 domain. Panel B: Histogram showing t-values of all Pfams present at a moderate level (total RPKM > 50), when comparing ice to water (Welch's t-test, log RPKM). The red vertical line (8.01) is the t-value of the DUF3494 domain. Panel C: scatterplot showing t-

values and abundance (log RPKM) of all 8012 Pfams present across the samples. The orange dot indicates the DUF3494 domain. Most Pfams are less differentially abundant when comparing ice to water (lower t-value), or otherwise less abundant overall (lower RPKM).

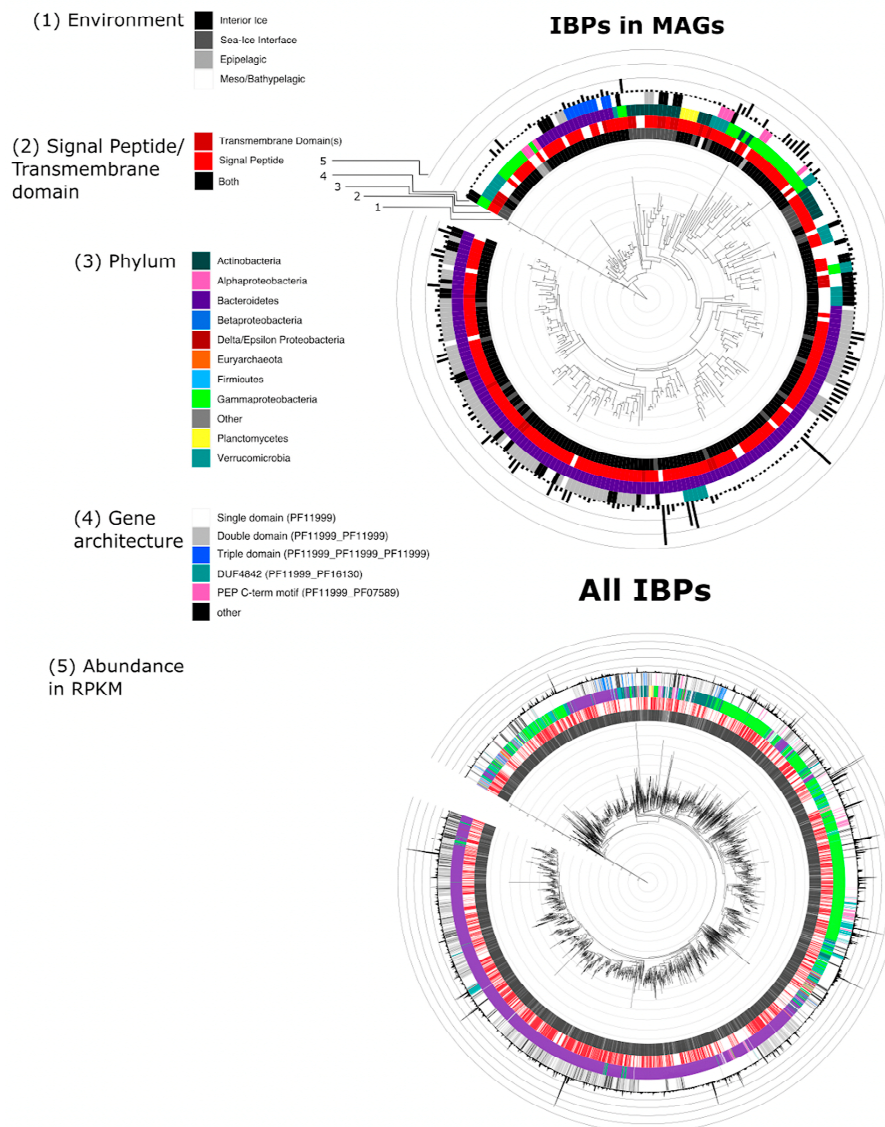

**Supplementary Figure S3:** Trees of IBPs from MAGs and total assembly.

**Supplementary Table S1:** Sample location, processing and sequencing data.

| Label               | Sample Collection Date | Depth (m)*  | Habitat  | Latitude | Longitude | Pooled?                      | Illumina Regular or Low Input 300 bp protocol | Filter Volume (mL) |
|---------------------|------------------------|-------------|----------|----------|-----------|------------------------------|-----------------------------------------------|--------------------|
| sea_ice_interface_1 | 13/01/2020             | 0.00- 0.05  | Sea Ice  | 87.3239  | 107.4423  |                              | Low input                                     | 1220               |
| epipelagic_1        | 16/01/2020             | 51          | Seawater | 87.5518  | 102.0858  |                              | regular                                       | 8500               |
| epipelagic_2        | 16/01/2020             | 51          | Seawater | 87.5518  | 102.0858  |                              | regular                                       | 8500               |
| epipelagic_3        | 16/01/2020             | 51          | Seawater | 87.5518  | 102.0858  | Yes, from epipelagic 1 and 2 | regular                                       | n/a                |
| sea_ice_interface_2 | 27/01/2020             | 0.00 - 0.05 | Sea Ice  | 87.4458  | 95.6702   |                              | Low input                                     | 1230               |
| interior_ice_1      | 03/02/2020             | 0.30 - 0.40 | Sea Ice  | 87.4122  | 93.2151   |                              | regular                                       | 2920               |
| interior_ice_2      | 03/02/2020             | 0.05 - 0.30 | Sea Ice  | 87.4122  | 93.2151   |                              | regular                                       | 2150               |
| interior_ice_3      | 03/02/2020             | 0.50 - 0.60 | Sea Ice  | 87.4122  | 93.2151   |                              | regular                                       | 1930               |
| interior_ice_4      | 03/02/2020             | 0.40 - 0.50 | Sea Ice  | 87.4122  | 93.2151   |                              | regular                                       | 1180               |
| sea_ice_interface_3 | 03/02/2020             | 0.00 - 0.05 | Sea Ice  | 87.4122  | 93.2151   |                              | Low input                                     | 1500               |
| epipelagic_4        | 06/02/2020             | 20          | Seawater | 87.5953  | 94.0846   | Yes, from epipelagic 5 and 6 | regular                                       | n/a                |
| epipelagic_5        | 06/02/2020             | 20          | Seawater | 87.5953  | 94.0846   |                              | regular                                       | 5500               |
| epipelagic_6        | 06/02/2020             | 20          | Seawater | 87.5953  | 94.0846   |                              | regular                                       | 8500               |
| meso/bathypelagic_1 | 06/02/2020             | 202         | Seawater | 87.5953  | 94.0846   |                              | Low input                                     | 9500               |
| meso/bathypelagic_2 | 07/02/2020             | 4082        | Seawater | 87.6362  | 93.7496   |                              | Low input                                     | 6000               |

\*For sea-ice samples, depth is relative to the sea-ice interface.

**Supplementary Table S2:** Sample IDs (Label used in this paper, MOSAiC, GOLD, JGI, and IMG/M, IDs). Data can be accessed through the JGI IMG/M web portal under proposal: The International Arctic Ice Drift Experiment MOSAiC: Seasonal changes of microbial communities across the Arctic Ocean (Proposal ID: 505419)

| Label               | MOSAiC Sample Identifier | GOLD ID   | JGI ID  | IMG/M ID   |
|---------------------|--------------------------|-----------|---------|------------|
| sea_ice_interface_1 | PS122_totDNA_309         | Gp0561256 | 1290821 | 3300045789 |

|                     |                           |           |         |            |
|---------------------|---------------------------|-----------|---------|------------|
| epipelagic_1        | PS122_totDNA_328          | Gp0561257 | 1290823 | 3300046532 |
| epipelagic_2        | PS122_totDNA_327          | Gp0561266 | 1292144 | 3300046450 |
| epipelagic_3        | PS122_totDNA_327_328_pool | Gp0561269 | 1292150 | 3300047669 |
| sea_ice_interface_2 | PS122_totDNA_371          | Gp0561258 | 1290827 | 3300045790 |
| interior_ice_1      | PS122_totDNA_414          | Gp0561263 | 1290837 | 3300049783 |
| interior_ice_2      | PS122_totDNA_411          | Gp0561260 | 1290831 | 3300046534 |
| interior_ice_3      | PS122_totDNA_412          | Gp0561261 | 1290833 | 3300047666 |
| interior_ice_4      | PS122_totDNA_413          | Gp0561262 | 1290835 | 3300047667 |
| sea_ice_interface_3 | PS122_totDNA_405          | Gp0561259 | 1290829 | 3300046449 |
| epipelagic_4        | PS122_totDNA_424_425_pool | Gp0561270 | 1292152 | 3300046103 |
| epipelagic_5        | PS122_totDNA_424          | Gp0561267 | 1292146 | 3300046451 |
| epipelagic_6        | PS122_totDNA_425          | Gp0561268 | 1292148 | 3300047668 |
| meso/bathypelagic_1 | PS122_totDNA_418          | Gp0561264 | 1290839 | 3300046467 |
| meso/bathypelagic_2 | PS122_totDNA_432          | Gp0561265 | 1290841 | 3300045738 |

**Supplementary Table S3: Assembly statistics**

| Label               | Raw<br>base<br>count | Raw<br>read<br>count | Filtered<br>base<br>count | Filtered<br>read<br>count | Number<br>of<br>contigs | Contig<br>N50<br>(bases) | Contig<br>N90<br>(bases) | Reads<br>aligned to<br>assembly | Reads<br>aligned to<br>assembly (%) |
|---------------------|----------------------|----------------------|---------------------------|---------------------------|-------------------------|--------------------------|--------------------------|---------------------------------|-------------------------------------|
| sea_ice_interface_1 | 845773<br>45974      | 5601148<br>74        | 8.3411E<br>+10            | 5566398<br>88             | 1263564                 | 941                      | 314                      | 52691883<br>1                   | 94.7                                |
| epipelagic_1        | 663821<br>53108      | 4396169<br>08        | 6.4723E<br>+10            | 4333009<br>50             | 3535797                 | 961                      | 364                      | 26526398<br>2                   | 61.2                                |
| epipelagic_2        | 466495<br>74580      | 3089375<br>80        | 4.393E+<br>10             | 2950724<br>06             | 2727462                 | 883                      | 306                      | 17043302<br>5                   | 57.8                                |
| epipelagic_3        | 469258<br>55958      | 3107672<br>58        | 4.1761E<br>+10            | 2805364<br>86             | 2461643                 | 915                      | 306                      | 15927116<br>5                   | 56.8                                |
| sea_ice_interface_2 | 786329<br>44074      | 5207479<br>74        | 7.6254E<br>+10            | 5091564<br>44             | 2267533                 | 779                      | 302                      | 45757680<br>0                   | 89.9                                |
| interior_ice_1      | 537574<br>62586      | 3560096<br>86        | 5.3096E<br>+10            | 3547798<br>56             | 2152549                 | 1227                     | 327                      | 30469861<br>5                   | 85.9                                |
| interior_ice_2      | 645195<br>01366      | 4272814<br>66        | 6.3638E<br>+10            | 4250009<br>74             | 2416493                 | 1605                     | 362                      | 37245402<br>7                   | 87.6                                |
| interior_ice_3      | 389987<br>55202      | 2582699<br>02        | 3.8395E<br>+10            | 2564653<br>28             | 1538500                 | 1442                     | 347                      | 21378131<br>5                   | 83.4                                |
| interior_ice_4      | 523448<br>70874      | 3466547<br>74        | 5.158E+<br>10             | 3444504<br>12             | 2045557                 | 1208                     | 332                      | 29547061<br>5                   | 85.8                                |
| sea_ice_interface_3 | 567809<br>37398      | 3760326<br>98        | 5.4565E<br>+10            | 3643884<br>56             | 1661614                 | 707                      | 304                      | 32507047<br>8                   | 89.2                                |
| epipelagic_4        | 628610               | 4162985              | 6.0507E                   | 4064715                   | 3482628                 | 784                      | 300                      | 26359788                        | 64.9                                |

|                     |                 |               |                |               |         |      |     |               |      |
|---------------------|-----------------|---------------|----------------|---------------|---------|------|-----|---------------|------|
|                     | 75010           | 10            | +10            | 84            |         |      |     | 8             |      |
| epipelagic_5        | 440197<br>71264 | 2915216<br>64 | 4.1953E<br>+10 | 2817164<br>88 | 2461877 | 853  | 306 | 17867599<br>3 | 63.4 |
| epipelagic_6        | 514677<br>41470 | 3408459<br>70 | 5.001E+<br>10  | 3354278<br>02 | 3050031 | 773  | 296 | 21505034<br>8 | 64.1 |
| meso/bathypelagic_1 | 569478<br>91152 | 3771383<br>52 | 5.586E+<br>10  | 3742934<br>82 | 3822139 | 766  | 316 | 25559932<br>9 | 68.3 |
| meso/bathypelagic_2 | 818958<br>59284 | 5423566<br>84 | 8.0629E<br>+10 | 5390569<br>76 | 3094213 | 1067 | 311 | 46445600<br>2 | 86.2 |

**Supplementary Table S4:** List of *Polarella glacialis* IBP accessions from the NCBI Short Read Archive (SRA), BioProject accession PRJEB33539

|              |              |              |              |              |              |              |              |              |
|--------------|--------------|--------------|--------------|--------------|--------------|--------------|--------------|--------------|
| CAE8729154.1 | CAE8679677.1 | CAE8631646.1 | CAE8583686.1 | CAE8583687.1 | CAE8636840.1 | CAE8636836.1 | CAE8582104.1 | CAE8583689.1 |
| CAE8636834.1 | CAE8583688.1 | CAE8582102.1 | CAE8582101.1 | CAE8631645.1 | CAE8582103.1 | CAE8631647.1 | CAE8679681.1 | CAE8729160.1 |
| CAE8729152.1 | CAE8618267.1 | CAE8677481.1 | CAE8741406.1 | CAE8583685.1 | CAE8637704.1 | CAE8618265.1 | CAE8639353.1 | CAE8634595.1 |
| CAE8639355.1 | CAE8637703.1 | CAE8729150.1 | CAE8582100.1 | CAE8581014.1 | CAE8741407.1 | CAE8618268.1 | CAE8639358.1 | CAE8636643.1 |
| CAE8688622.1 | CAE8639354.1 | CAE8639356.1 | CAE8636651.1 | CAE8585100.1 | CAE8628465.1 | CAE8588114.1 | CAE8595931.1 | CAE8636649.1 |
| CAE8636648.1 | CAE8671768.1 | CAE8671762.1 | CAE8671764.1 | CAE8636642.1 | CAE8671759.1 | CAE8636644.1 | CAE8640504.1 | CAE8696859.1 |
| CAE8625316.1 | CAE8634924.1 | CAE8636647.1 | CAE8604292.1 | CAE8607075.1 | CAE8668303.1 | CAE8654806.1 | CAE8643832.1 | CAE8652165.1 |
| CAE8601668.1 | CAE8671765.1 | CAE8636645.1 | CAE8720042.1 | CAE8717284.1 | CAE8611419.1 | CAE8622661.1 | CAE8618266.1 | CAE8677484.1 |
| CAE8640451.1 | CAE8647134.1 | CAE8635871.1 | CAE8652167.1 | CAE8622663.1 | CAE8581017.1 | CAE8635872.1 | CAE8594356.1 | CAE8643833.1 |
| CAE8594357.1 | CAE8647038.1 | CAE8641817.1 | CAE8647135.1 | CAE8588179.1 | CAE8585364.1 | CAE8654565.1 | CAE8650135.1 | CAE8602834.1 |
| CAE8717287.1 | CAE8743901.1 | CAE8706293.1 | CAE8729157.1 | CAE8591189.1 | CAE8629564.1 | CAE8649369.1 | CAE8675450.1 | CAE8634922.1 |
| CAE8700145.1 | CAE8613500.1 | CAE8623192.1 | CAE8647136.1 | CAE8616734.1 | CAE8631824.1 | CAE8588201.1 | CAE8627979.1 | CAE8720727.1 |
| CAE8688779.1 | CAE8616733.1 | CAE8607076.1 | CAE8706292.1 | CAE8616732.1 | CAE8687224.1 | CAE8624346.1 | CAE8675449.1 | CAE8625315.1 |
| CAE8743391.1 | CAE8723718.1 | CAE8624936.1 | CAE8642055.1 | CAE8720725.1 | CAE8743390.1 | CAE8702088.1 | CAE8588202.1 | CAE8613502.1 |
| CAE8588206.1 | CAE8588203.1 | CAE8703796.1 | CAE8671446.1 | CAE8690017.1 | CAE8681934.1 | CAE8613501.1 | CAE8598188.1 | CAE8687064.1 |

**Supplementary Table S5:** Genomic context of IBPs from selected MAGs.

| Organism                         | architecture        | contig ID          | IBP position | Upstream Pfams | Upstream position | Upstream grouping  | Downstream Pfams    | Downstream position | Downstream grouping                       |
|----------------------------------|---------------------|--------------------|--------------|----------------|-------------------|--------------------|---------------------|---------------------|-------------------------------------------|
| Crocinitomicaceae; UBA4466       | 11999_11999         | Ga0491196_0000314  | 41016_44504  | pfam13412      | 39626 - 40375     | DNA_binding        | pfam13532           | 45866_46459         | oxygenase                                 |
|                                  | 11999_11999         | Ga0491196_0000991  | 29281_31188  | pfam00132      | 26291_26482       | hexapeptide_repeat | pfam13585_pfam0080  | 31280_33334         | secretion_lg_containing                   |
|                                  | 11999_11999         | Ga0491196_0002878  | 3075_5033    | NA             |                   |                    | pfam01609           | 5440_5775           | transposase                               |
|                                  | 11999_11999         | Ga0491196_0004603  | 1035_4541    | pfam01527 (    | 589_903           | transposase        | pfam13369           | 6504_7412           | transglutaminase                          |
|                                  | 11999_11999         | Ga0491196_0006284_ | 5019_6899    | pfam11251      | 4103_4885         | redox-related      | pfam01527           | 7633_7914           | transposase                               |
|                                  | 11999_11999         | Ga0491196_0006863  | 7168_9048    | pfam04185      | 5000_7027         | phosphoesterase    | pfam05970           | 10165_12465         | helicase                                  |
| Flavobacteriaceae; GCA-002733185 | pfam11999_pfam07603 | Ga0491197_0011800  | 1860_3128    | pfam02110      | 88_879            | kinase             | pfam12740           | 4839_5759           | chlorophyllase                            |
|                                  | pfam11999_pfam11999 | Ga0491197_0008641  | 2_1189       | NA             |                   |                    | pfam00009           | 1591_1962           | translation (elongation factor TU)        |
|                                  | pfam11999           | Ga0491197_0005030  | 61_1332      | NA             |                   |                    | pfam11999           | 1406_2662           | IBP                                       |
|                                  | pfam11999           | Ga0491197_0005030  | 2831_4087    | pfam11999      | 1406_2662         | IBP                | pfam00664_pfam00005 | 4853_6589           | transporter_transporter (ABC transporter) |
|                                  | pfam11999           | Ga0491197_0005030  | 1406_2662    | pfam11999      | 61_1332           | IBP                | pfam11999           | 2831_4087           | IBP                                       |

|                                         |                                       |                           |             |                                                      |                 |                                                                                                     |                                   |             |                                               |
|-----------------------------------------|---------------------------------------|---------------------------|-------------|------------------------------------------------------|-----------------|-----------------------------------------------------------------------------------------------------|-----------------------------------|-------------|-----------------------------------------------|
|                                         | pfam11999                             | Ga04911<br>97_00041<br>11 | 3_929       | NA                                                   |                 |                                                                                                     | pfam00501                         | 2273_3289   | AMP-binding                                   |
|                                         | pfam11999                             | Ga04911<br>97_00019<br>59 | 1113_1889   |                                                      |                 | IBP                                                                                                 | pfam08695                         | 3738_4082   | cytochrome_oxi<br>dase                        |
|                                         | pfam11999                             | Ga04911<br>97_00019<br>59 | 1_390       | NA                                                   |                 |                                                                                                     | pfam11999                         | 1113_1889   | IBP                                           |
|                                         | pfam11999_<br>pfam11999_<br>pfam01345 | Ga04911<br>97_00010<br>71 | 33995_36562 | pfam00009_pfam16<br>658                              | 32025_3361<br>1 | translation<br>(elongatio<br>n factor<br>TU)_transl<br>ation<br>(translatio<br>n release<br>factor) | NA                                |             |                                               |
| Myxococcota;<br>UBA796; GCA-<br>2862545 | pfam11999                             | Ga04911<br>96_00034<br>86 | 10900_11541 | pfam11617 x 10                                       | 5868_8915       | metal_bin<br>ding_motif                                                                             | pfam03050                         | 13929_14261 | transposase                                   |
|                                         | pfam11617_<br>pfam11999               | Ga04911<br>96_00034<br>86 | 14591_16588 | pfam03050                                            | 13929_1426<br>1 | transposa<br>se                                                                                     | pfam04389                         | 16901_17839 | peptidase                                     |
|                                         | pfam02412_<br>pfam11999               | Ga04911<br>96_00124<br>52 | 874_2703    | NA                                                   |                 |                                                                                                     | pfam01380_pfam01380<br>_pfam13537 | 6209_7717   | sugar isomerase<br>&<br>amidottransferas<br>e |
| Spirosomaceae;<br>Unknown               | pfam11999_<br>pfam11999_<br>pfam11999 | Ga04911<br>97_00004<br>63 | 45380_47548 | pfam14684_pfam14<br>685_pfam03572_pfa<br>m07676 (x5) | 41907_4520<br>6 | protease_<br>peptidase_<br>_cell_surfa<br>ce protein                                                | pfam03313                         | 48074_49609 | Serine<br>dehydratase                         |
| Bacteroidia;<br>NS11-12g;<br>UBA9320    | pfam11999_<br>pfam11999               | Ga04911<br>97_00057<br>99 | 3232_5151   |                                                      |                 | IBP                                                                                                 |                                   |             | IBP                                           |
|                                         | pfam11999_<br>pfam11999               | Ga04911<br>97_00057<br>99 | 5881_7797   |                                                      |                 | IBP                                                                                                 |                                   |             | IBP                                           |

|  |                         |                           |            |    |    |     |           |             |                    |
|--|-------------------------|---------------------------|------------|----|----|-----|-----------|-------------|--------------------|
|  | pfam11999_<br>pfam11999 | Ga04911<br>97_00057<br>99 | 782_2698   | NA | NA | NA  |           |             | IBP                |
|  | pfam11999_<br>pfam11999 | Ga04911<br>97_00057<br>99 | 8860_10776 |    |    | IBP | pfam04055 | 11264_12343 | SAM<br>superfamily |
